# Supplementary material for: Tremor evaluation using smartphone accelerometry in standardized settings
Source: Frontiers journal article supplement (doi:10.3389/fnins.2022.861668), 2022-08-01
Supplement: Data_Sheet_1.pdf [file Data_Sheet_1.pdf]

## *Supplementary Material*

### 1. Supplementary Figures

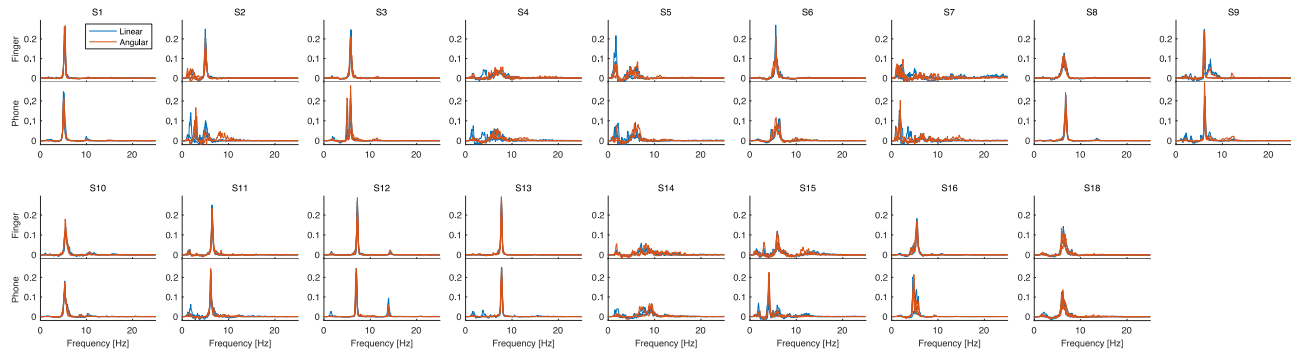

**Supplementary Figure 1.** Power spectral density of postural tremor in all ET patients plotted for recording condition position P1.

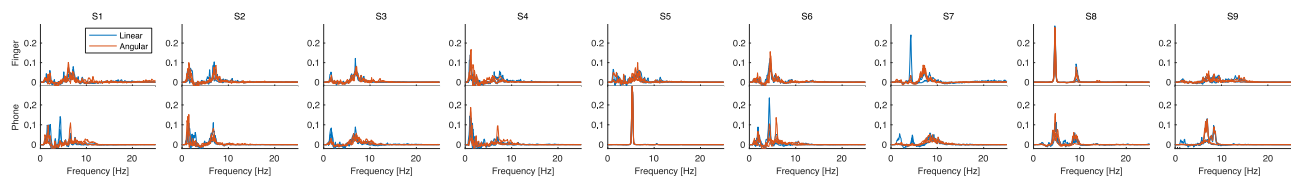

**Supplementary Figure 2.** Power spectral density of postural tremor in all PD patients plotted for recording condition position P1.
